# Supplementary material
Source: PubMed Central journal article supplement (PMC10751043)
Supplement: NIHMS1922844-supplement-Supp_Tables.pdf [file NIHMS1922844-supplement-Supp_Tables.pdf]

**Supplementary Table 1. ICD-10 diagnostic codes**

|                                      | ICD-10 Code                                                                   |
|--------------------------------------|-------------------------------------------------------------------------------|
| Psychiatric Disorders                |                                                                               |
| Psychotic Disorders                  | F2X (excluding F20.89)                                                        |
| Bipolar Disorder                     | F30X, F31X, F34.0X, excluding in remission (F30.4, F31.70, .72, .74, .76,.78) |
| Depressive Disorders                 | F32X, F33X, F34.1X, excluding in remission (F32.5, F33.40, F33.42)            |
| PTSD                                 | F43.10, F43.12                                                                |
| Panic Disorders                      | F41 .0                                                                        |
| Phobias                              | F40.0x-.2x, .8, .9                                                            |
| General/Other Anxiety Disorders      | F41.1, .3, .8, .9                                                             |
| Elevated Suicide Risk                | X7X (excluding X70X), X80X, X81X, X82X, X83X, T14.91X                         |
| Chronic Pain Conditions <sup>a</sup> | See Mayhew et al., 2019 <sup>b</sup>                                          |
| Substance Use Disorders              |                                                                               |
| Cannabis                             | F12.1X and F12.2X, excluding in remission (F12.11, F12.21)                    |
| Alcohol                              | F10.1X and F10.2X, excluding in remission (F10.11, F10.21)                    |
| Opioid                               | F11.1X and F11.X, excluding in remission (F11.11, F11.21)                     |
| Cocaine                              | F14.1X and F14.2X, excluding in remission (F14.11, F14.21)                    |
| Other Stimulants                     | F15.1X and F15.2X, excluding in remission (F15.11, F15.21)                    |
| Sedatives                            | F13.1X and F13.2X, excluding in remission (F13.11, F13.21)                    |
| Nicotine                             | F17.2X, Z72.0, Z78.891, excluding in remission (F17.2X1, Z87.891)             |
| Other Substances                     | F16.X, F18.X, F19.X, excluding in remission (F1X.11, F1X.21)                  |

<sup>a</sup> Including at least one of the following chronic pain clusters: (1) Back; (2) Neck; (3) Limb/extremity, joint or non-systemic non-inflammatory arthritic disorders; (4) Fibromyalgia; (5) Headache/migraine; (6) Orofacial/ear/temporomandibular disorders; (7) Abdominal/bowel disorders; (8) Urogenital/pelvic/menstrual disorders; (9) Neuropathy; (10) Systemic disorders; and (11) Other.

<sup>b</sup> Chronic pain conditions included over 3,000 unique ICD-10 codes across several pain conditions, therefore, ICD-10 codes were not included in the table. Chronic pain conditions in the present study were based on Mayhew, M., DeBar, L. L., Deyo, R. A., Kerns, R. D., Goulet, J. L., Brandt, C. A., & Von Korff, M. (2019). Development and assessment of a crosswalk between ICD-9-CM and ICD-10-CM to identify patients with common pain conditions. *The Journal of Pain*, 20(12), 1429-1445.
